# Supplementary material for: Gut Microbiome Composition and Dynamics in Hospitalized COVID-19 Patients and Patients with Post-Acute COVID-19 Syndrome
Source: MDPI journal article supplement (doi:10.3390/ijms25010567), 2024-01-01
Supplement: s1 [file s1]

## *Supplementary Material*

### **Gut microbiome composition and dynamics in hospitalized COVID-19 patients and patients with post-acute COVID-19 syndrome**

Monta Brīvība, Laila Silamiķele, Līga Birzniece, Kaspars Megnis, Laura Ansone, Ivars Silamiķelis, Līva Pelcmane, Daniella Borisova, Maija Rozenberga, Lauma Jagare, Ilze Elbere, Jānis Klovīņš.

\* Correspondence:

**Corresponding Author:** monta@biomed.lu.lv

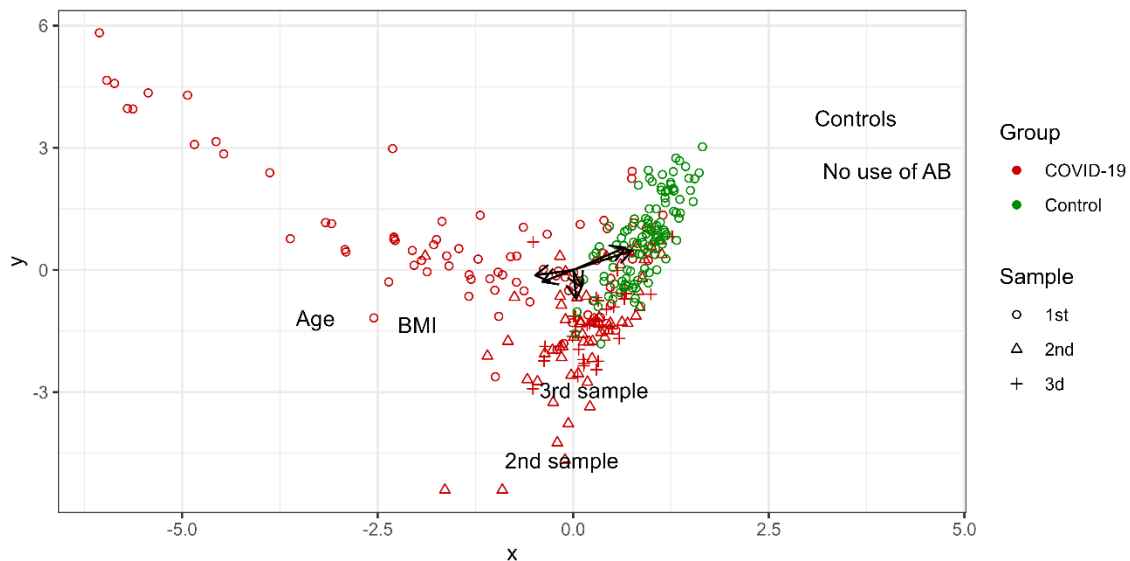

**Figure S1.** Canonical correspondence analysis (CCA) plot visualizing the correlation of the microbiome between COVID-19 patients (red), healthy controls (green), and sample types. Sample types are as follows: 1st- acute disease phase; 2nd- 1 month since acute phase; 3rd- 3 months since acute disease phase. Environmental factors with significant contributions to the distribution of the gut microbiota community are shown.

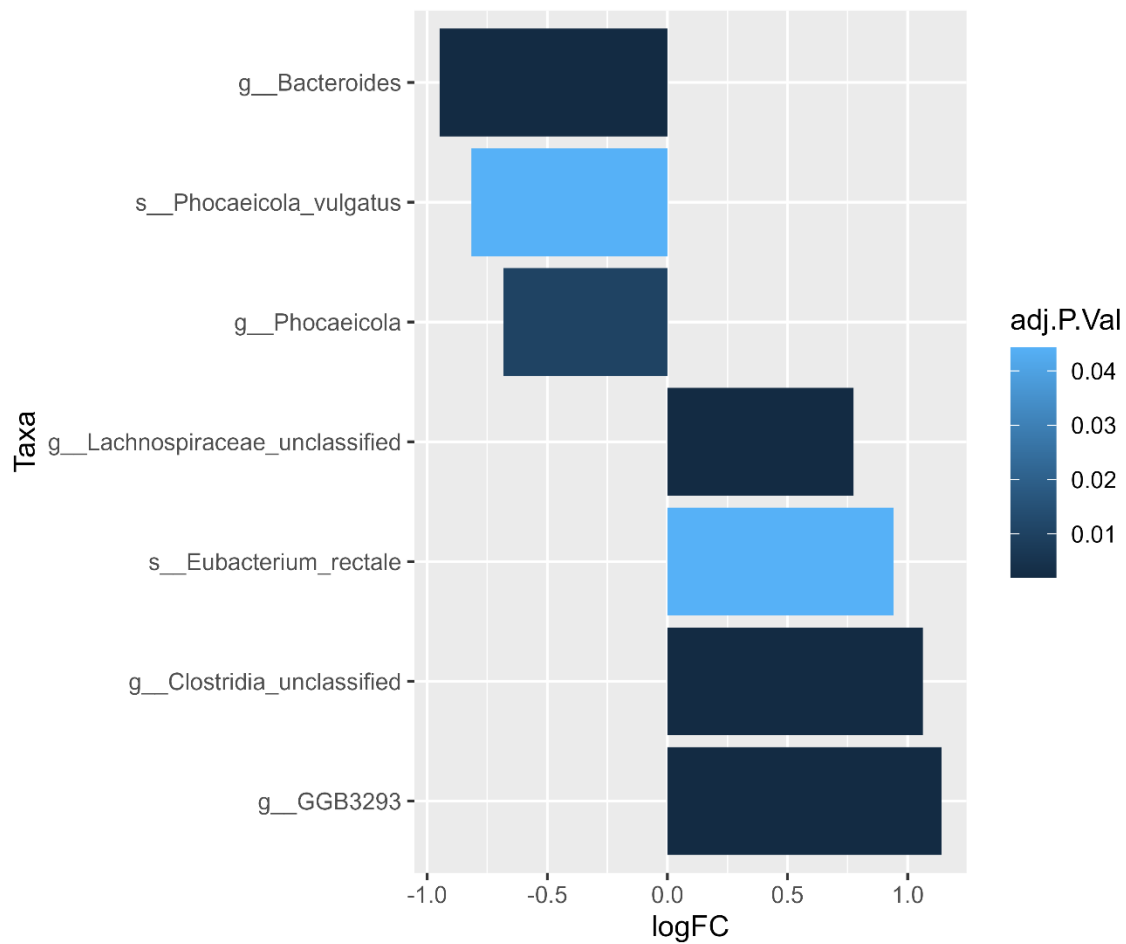

**Figure S2.** Differential abundance at genus and species levels (expressed as LogFC). Positive LogFC represents taxa with increased abundance in the COVID-19 patient group not administering antibiotics, and negative LogFC – COVID-19 patient group administrating antibiotics.

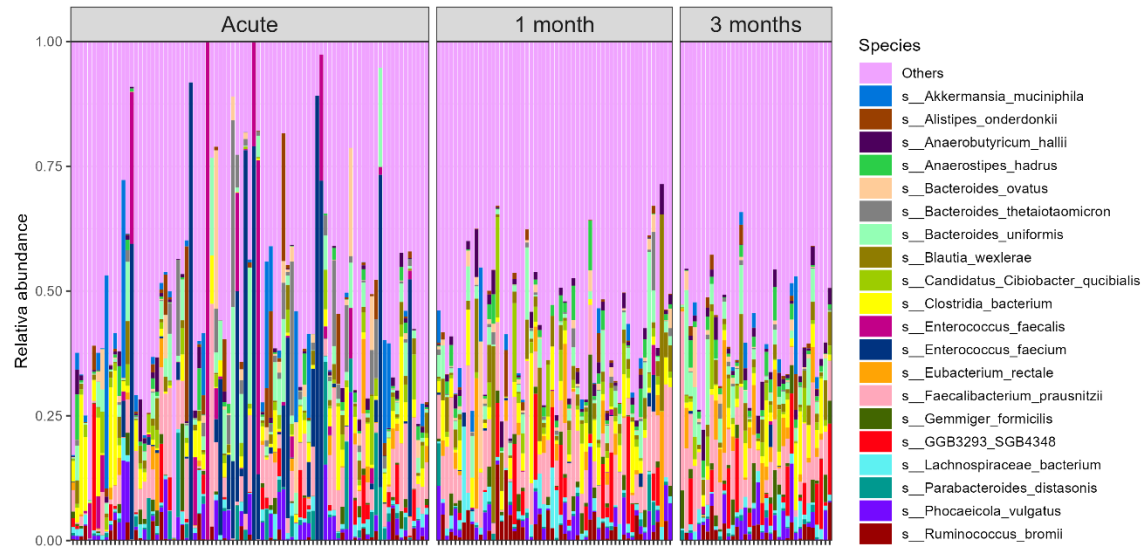

**Figure S3.** Taxonomy bar plot depicting 20 of the most representative species of samples from hospitalized patients collected at three consecutive time points during the course of the disease.

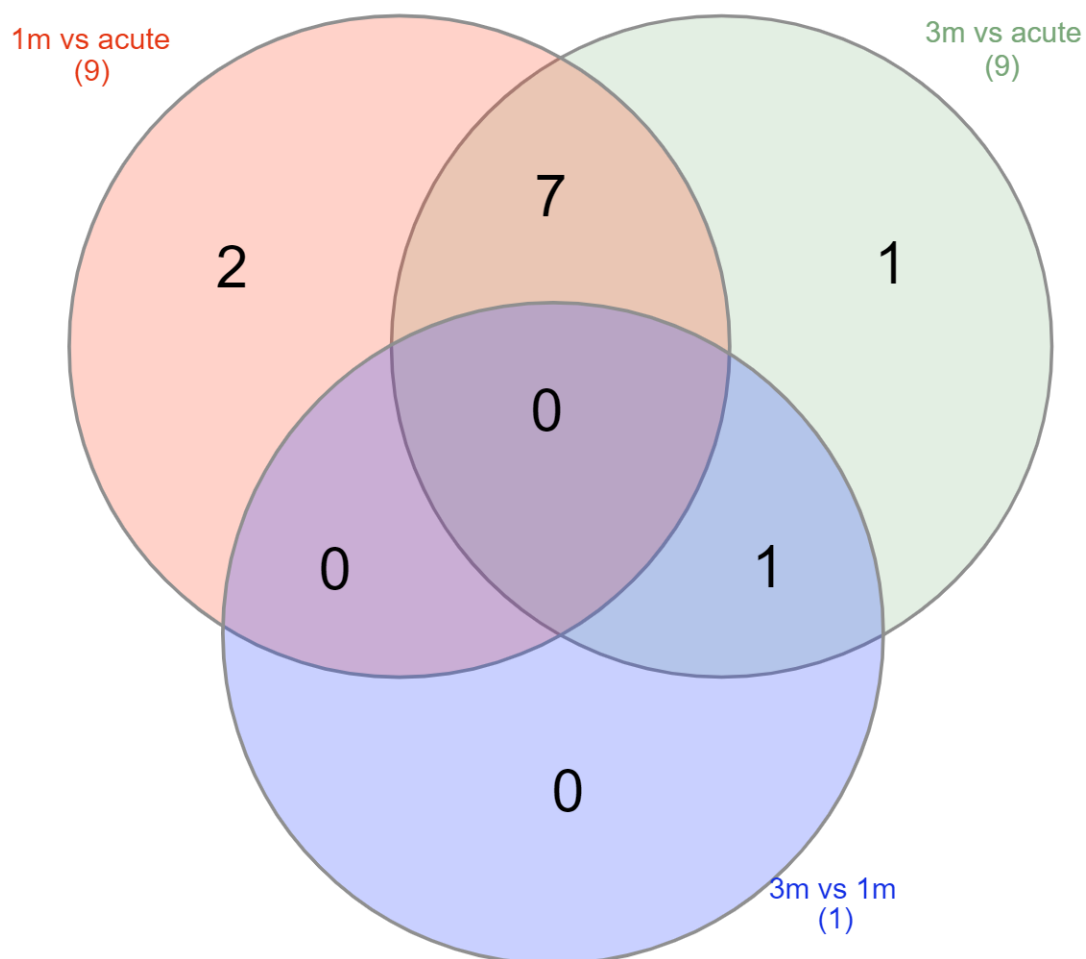

**Figure S4.** Venn diagram depicting the overlap of significantly altered relative abundance of bacterial species and genus combined among analyzed contrasts. Acute - samples collected during the acute phase of the disease; 1m - samples collected around 1 month since the COVID-19 acute phase; 3m - samples collected around 3 months since the COVID-19 acute phase.
